# Supplementary material for: Conformational effects in the identification and quantification of ketohydroperoxides in the oxidation of n-pentane
Source: Royal Society of Chemistry journal article supplement (doi:10.1039/d4cp04184d), 2024-12-19
Supplement: d4cp04184d1.pdf [file d4cp04184d1.pdf]

# Supporting Information

## Conformational effects in the identification and quantification of ketohydroperoxides in the oxidation of n-pentane

Dongyang Li<sup>1</sup>, Deshan Li<sup>2</sup>, Olivier Herbinet<sup>3</sup>, Jiabin Huang<sup>1</sup>, Gustavo A. Garcia<sup>4</sup>, Philippe Arnoux<sup>3</sup>, Luc-Sy Tran<sup>5</sup>, Guillaume Vanhove<sup>5</sup>, Laurent Nahon<sup>4</sup>, Majdi Hochlaf<sup>6</sup>, Hans-Heinrich Carstensen<sup>7,8</sup>,  
Frédérique Battin-Leclerc<sup>3</sup>, Julien Bloino<sup>2</sup>, Feng Zhang<sup>1,9\*</sup>, and Jérémy Bourgalais<sup>3,\*</sup>

<sup>1</sup>Hefei National Laboratory for Physical Sciences at the Microscale, University of Science and Technology of  
China, Hefei, Anhui, 230026, People's Republic of China

<sup>2</sup>Scuola Normale Superiore, Pisa, Italy

<sup>3</sup>Université de Lorraine, CNRS, LRGP, F-54000 Nancy, France

<sup>4</sup>Synchrotron SOLEIL, L'Orme des Merisiers, Départementale 128, 91190 Saint-Aubin, France

<sup>5</sup>PC2A, Université de Lille, CNRS; Avenue Mendeleiev, 59650 Villeneuve-d'Ascq, France

<sup>6</sup>Université Gustave Eiffel, COSYS/IMSE, 5 Bd Descartes, 77454 Champs sur Marne, France

<sup>7</sup>Fundación Agencia Aragonesa para la Investigación y el Desarrollo (ARAID), Zaragoza, 50018, Spain

<sup>8</sup>Escuela de Ingeniería y Arquitectura, Universidad de Zaragoza, Zaragoza, 50018, Spain

<sup>9</sup>Hefei National Laboratory, University of Science and Technology of China, Hefei, Anhui 230088, People's  
Republic of China

## Table of Content

|      |                                                                                          |    |
|------|------------------------------------------------------------------------------------------|----|
| I.   | Experimental Details for the Analysis of the JSR Gas Mixture and TPES Acquisition: ..... | 2  |
| II.  | Off-Line Measurements of KHPs in JSR Gas Mixture:.....                                   | 2  |
| III. | Ion Signals as Function of Temperature:.....                                             | 4  |
| IV.  | Theoretical Method: .....                                                                | 4  |
| V.   | Simulation of Vibronic Envelopes:.....                                                   | 9  |
| VI.  | KHP Quantification Method:.....                                                          | 14 |
|      | References: .....                                                                        | 16 |

34 I. Experimental Details for the Analysis of the JSR Gas Mixture and TPES Acquisition:  
35 The JSR is housed into a high vacuum chamber with a pressure of approximately  $10^{-4}$  mbar. At  
36 the outlet of the JSR, a micrometer pinhole is utilized to expand a gas sample. This expansion creates  
37 an effusive molecular beam, where reactive collisions are minimized due to the low number density  
38 and dilution with a carrier gas (He in this case). Consequently, reactive intermediates are preserved  
39 during the expansion and flow in a collision-free regime (no intermolecular interactions) to the  
40 ionization chamber.

41 Nevertheless, it is important to consider that a time delay exists between the exit of the JSR  
42 and the detection of molecules, which can lead to changes in concentrations inside the reactor and  
43 result in temporal profile shifts. Furthermore, as molecules have different energies, the time delay will  
44 have a distribution, leading to a blurring of the temporal profile.<sup>1</sup> In our study, we have mitigated these  
45 effects by: 1) positioning the reactor in close proximity to the ionization region (approximately 14 cm),  
46 and 2) adiabatically expanding the reactor contents to generate a supersonic beam. When helium is  
47 used as the dilutant or carrier gas, the time delay is less than 10  $\mu$ s.

48 In the ionization chamber, the species present are subjected to direct ionization upon exposure  
49 to incident vacuum ultraviolet (VUV) photons. This process leads to the generation of electrons and  
50 ions. These particles subsequently travel in opposite directions, dispersing based on their respective  
51 kinetic energies, before reaching the velocity map imagers (VMI) and forming concentric rings. The  
52 arrival times of the dispersed particles are recorded, and by selecting the electron arrival time as the  
53 reference point for time-of-flight detection of the photoion, mass spectra can be plotted. With  
54 photoion-mass selection, the VMI system allows, by using an Abel inversion technique, the  
55 construction of a two-dimensional matrix of photoelectron spectra (PES) as a function of photon  
56 energy. By selecting a specific kinetic energy range, the corresponding threshold photoelectron  
57 spectrum (TPES) can be obtained.

58

59 II. Off-Line Measurements of KHPs in JSR Gas Mixture:

60 The sample was trapped at room temperature and then analyzed at LRGP in Nancy using gas  
61 chromatography (GC) coupled to both a quadrupole mass spectrometer (MS) and a flame ionization  
62 detector (FID). The collected sample was diluted in acetone and injected into the GC in the liquid state  
63 using an automatic liquid sampler and a split mode injector. Although a HP5 capillary column was used,  
64 a perfect peak separation could not be achieved and many species remained co-eluted. The outlet of  
65 the column was connected to an auxiliary pressure control device splitting the flow towards both  
66 detectors. The chromatogram obtained during the analysis of the sample collected at the outlet of the  
67 reactor at SOLEIL (the sample was collected during the entire campaign,  $\sim$ 5 days) is displayed in Figure  
68 S1. The GC analysis detected a large number of peaks corresponding to many species accumulated

69 during the 5 days. The MS displayed in Figure S2 corresponds to the peak at retention time 30.5 min  
 70 in the chromatogram of Figure S1 and found to be similar to the one recorded by Hu et al.<sup>2</sup> and  
 71 attributed to 2,4-KHP. This pattern is expected to resemble that reported by Jorand et al.<sup>3</sup> for 2-  
 72 hexanone-4-hydroperoxide (see Figure S3) except for the fact that the KHP for n-pentane contains one  
 73 CH<sub>2</sub> group less (-14 a.m.u.). More specifically, the following main fragments are expected for 2,4-KHP:  
 74 m/z 43, 57, 71, 85, and 100.

75  
 76

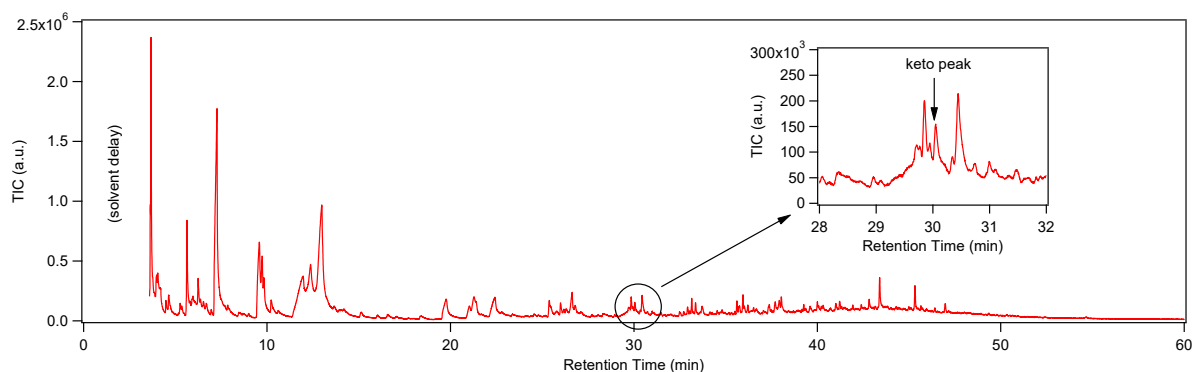

77  
 78  
 79  
 80

Figure S1: Chromatogram recorded during the analysis of the sample collected at the outlet of the reactor. TIC = total ion count.

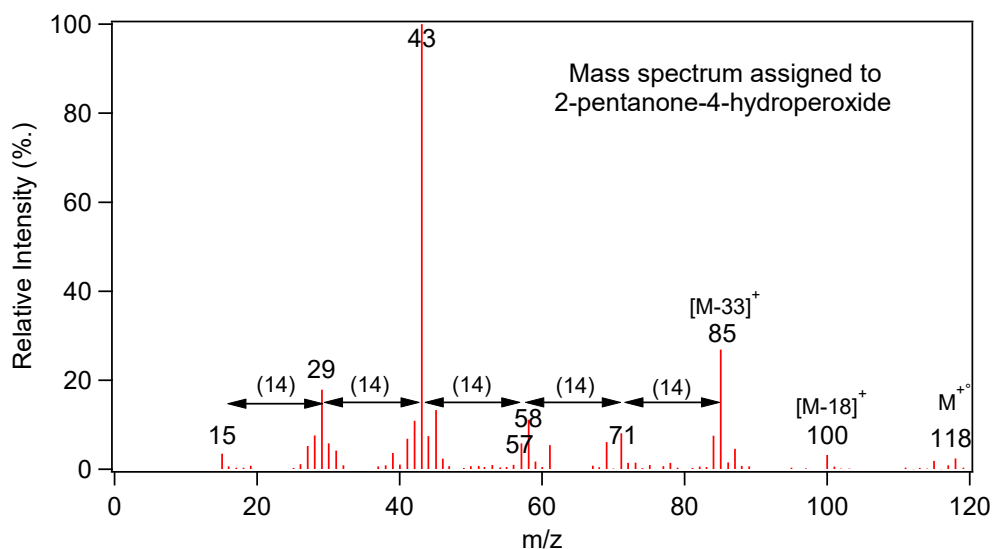

81  
 82  
 83  
 84

Figure S2. Mass spectrum from electronic ionization at 70 eV recorded during the analysis of the sample collected at the outlet of the JSR assigned to 2,4-KHP.

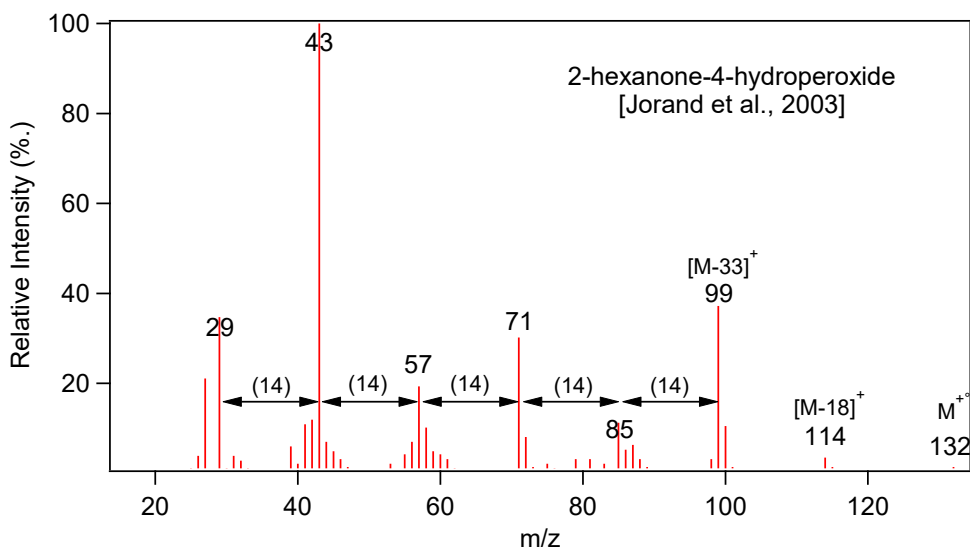

85

86

Figure S3. Mass spectrum recorded for 2-hexanone-4-hydroperoxide by Jorand et al.<sup>3</sup>.

87

88

III. Ion Signals as Function of Temperature:

89

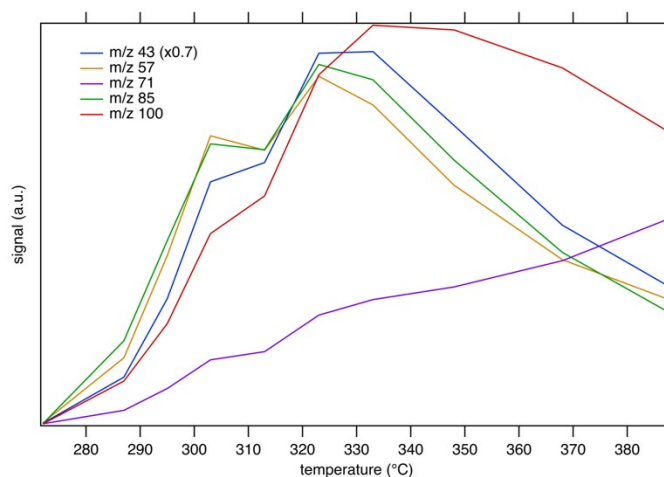

90

Figure S4. Ion signal at 10.5eV as a function of temperature for m/z 43, 57, 71, 85, and 100 (numbers in the graphs indicate factors by which the signals are multiplied/divided).

92

93

94

IV. Theoretical Method:

95

With numerous publications focusing on testing the performance of theoretical methods,<sup>4</sup> DFT

97

offers an excellent compromise between required computation time and the quality of the results,

98

while CCSD(T) calculations provide benchmark-quality results, making the combination of DFT and

99

CCSD(T) as universal choice for most of system. In terms of basis selection, the more functions included

100

in the basis set, the better the accuracy, albeit at a higher computational cost. Due to the influence of

101

weak interactions, diffuse functions are necessary for achieving higher accuracy on energies.

102

For the conformational analysis, molecular dynamics simulations were initially performed at

103

585 K using Molclus<sup>5</sup> and xtb<sup>6</sup>. The structure was sampled every 50 femtoseconds, with a total sampling

104 time of 100 picoseconds resulting in 2,000 conformers. Subsequently, these conformers underwent  
 105 optimization and screening using the gfn0-xtb<sup>7</sup>, gfn2-xtb<sup>6</sup>, and M06-2X-D3/cc-pVTZ<sup>8-10</sup> methods  
 106 sequentially. The screening criteria considered conformers with an energy difference less than 0.5  
 107 kcal/mol and a root mean square displacement (RMSD) less than 0.5 Å to be identical. Single-point  
 108 energies were calculated using CCSD(T)/aug-cc-pVTZ<sup>10,11</sup>, and the zero-point energy from M06-2X-  
 109 D3/cc-pVTZ was corrected by a factor of 0.971. Finally, Gibbs free energies at 585 K were obtained  
 110 using the Shermo program<sup>12</sup> to generate the Boltzmann distribution.

111 The structures of dehydration and OOH dissociation mechanism were optimized by M06-2X-  
 112 D3/cc-pVTZ method. Additionally, frequency calculations and intrinsic reaction coordinates (IRCs) were  
 113 performed using the same method, with a zero-point energy (ZPE) correction factor of 0.971<sup>13</sup>. To  
 114 enhance accuracy, high-level single-point energies were further refined using CCSD(T)/aug-cc-pVTZ. All  
 115 density functional theory (DFT) calculations were carried out using the Gaussian 16 program<sup>14</sup>, while  
 116 coupled-cluster calculations were conducted using the ORCA program package<sup>15</sup>.

117

118 *Table S1. Energies(relative to Conf-1), Boltzmann distribution at 585K, adiabatic ionized energies (AIE) and*  
 119 *vertical ionized energies (VIE) of the main 2,4-KHP conformers considered in this work, calculated at the*  
 120 *(R)CCSD(T)/aug-cc-pVTZ//M06-2X-D3/cc-pVTZ level of theory*

121

|        | Energies/eV | Boltzmann distribution | AIE/eV | VIE/eV |
|--------|-------------|------------------------|--------|--------|
| Conf-1 | 0.000       | 26.00%                 | 9.508  | 9.963  |
| Conf-2 | 0.045       | 26.03%                 | 9.034  | 9.749  |
| Conf-3 | 0.019       | 13.74%                 | 9.062  | 10.239 |
| Conf-4 | 0.065       | 22.50%                 | 9.276  | 9.814  |
| Conf-5 | 0.085       | 11.05%                 | 9.317  | 9.513  |
| Conf-6 | 0.211       | 0.72%                  | 9.340  | 9.548  |

122

123

124 *Table S2. Optimized coordinates (in Å) and frequencies (in cm<sup>-1</sup>) of the 2,4-KHP conformers considered*  
 125 *in this work and their cations, calculated by M06-2X-D3/cc-pVTZ*

| Neutral 2,4-KHP Conformers |                   |           |           |                              |           |           |           |
|----------------------------|-------------------|-----------|-----------|------------------------------|-----------|-----------|-----------|
|                            | Geometry/angstrom |           |           | Frequencies/cm <sup>-1</sup> |           |           |           |
| Conf-1                     | C                 | 2.471463  | -0.816506 | 0.466211                     | 48.0156   | 118.5248  | 140.7308  |
|                            | C                 | 1.435742  | 0.006717  | -0.247307                    | 182.8299  | 208.6158  | 224.4166  |
|                            | C                 | 0.193173  | -0.705265 | -0.734401                    | 283.7271  | 321.0880  | 417.3149  |
|                            | C                 | -0.911806 | -0.642701 | 0.333730                     | 444.5435  | 535.9398  | 569.4504  |
|                            | C                 | -2.250466 | -1.092273 | -0.219456                    | 605.2617  | 624.6246  | 818.0307  |
|                            | O                 | 1.564323  | 1.199413  | -0.401674                    | 843.5070  | 907.6400  | 958.8217  |
|                            | O                 | -0.986798 | 0.647010  | 0.920240                     | 972.2566  | 1001.7593 | 1037.5625 |
|                            | O                 | -1.241962 | 1.597288  | -0.105256                    | 1109.4832 | 1137.9102 | 1162.4765 |
|                            | H                 | 3.246642  | -0.175716 | 0.874573                     | 1212.4704 | 1268.6026 | 1315.8637 |
|                            | H                 | 1.998172  | -1.393206 | 1.263047                     | 1359.9427 | 1380.3642 | 1395.0212 |
|                            | H                 | 2.907632  | -1.533642 | -0.231588                    | 1408.7874 | 1462.9945 | 1473.6313 |
|                            | H                 | 0.402471  | -1.751048 | -0.960457                    | 1476.7841 | 1483.3901 | 1490.5300 |
| H                          | -0.157930         | -0.208015 | -1.637542 | 1506.1058                    | 1832.9643 | 3063.5262 |           |

|                                      |                                 |                               |
|--------------------------------------|---------------------------------|-------------------------------|
|                                      | H -0.629101 -1.263389 1.188295  | 3067.3237 3073.7039 3090.1212 |
|                                      | H -2.565344 -0.415624 -1.011873 | 3125.8158 3145.7748 3149.8122 |
|                                      | H -3.001591 -1.082006 0.568101  | 3161.6814 3185.9238 3692.5977 |
|                                      | H -2.178061 -2.101359 -0.625274 |                               |
|                                      | H -0.336024 1.874483 -0.326416  |                               |
| Conf-2                               | C -2.915081 0.143304 -0.520434  | 40.3632 64.5598 114.4099      |
|                                      | C -1.605684 -0.085674 0.188329  | 139.7134 192.9236 242.1739    |
|                                      | C -0.509534 0.929329 -0.088344  | 284.4168 317.8033 336.0729    |
|                                      | C 0.866993 0.415121 0.277420    | 353.6156 464.6424 486.8489    |
|                                      | C 1.943580 1.480016 0.236873    | 531.6802 630.0906 805.5358    |
|                                      | O -1.436998 -1.012087 0.939266  | 842.9529 888.2613 956.9828    |
|                                      | O 1.116590 -0.600699 -0.691177  | 976.3596 997.6327 1061.2530   |
|                                      | O 2.204153 -1.386073 -0.234092  | 1133.0196 1140.6823 1173.9632 |
|                                      | H -3.678503 -0.516535 -0.119486 | 1199.4426 1262.4538 1324.8734 |
|                                      | H -3.223653 1.185525 -0.430493  | 1379.0066 1388.2678 1408.7225 |
|                                      | H -2.776936 -0.060670 -1.584055 | 1417.6354 1424.0100 1444.2752 |
|                                      | H -0.738743 1.828628 0.490762   | 1467.8863 1479.4848 1489.6348 |
|                                      | H -0.534935 1.223622 -1.140495  | 1506.9401 1853.9341 3061.1705 |
|                                      | H 0.819621 -0.057868 1.260514   | 3065.8172 3066.8980 3081.3558 |
|                                      | H 2.917650 1.024297 0.402763    | 3104.6843 3129.5303 3139.4697 |
|                                      | H 1.773182 2.228261 1.011232    | 3157.6895 3182.8153 3810.9595 |
|                                      | H 1.950466 1.974207 -0.735102   |                               |
| H 1.740245 -2.131164 0.169322        |                                 |                               |
| Conf-3                               | C -2.491032 0.390842 -0.211073  | 66.1815 111.4520 155.0972     |
|                                      | C -1.252154 -0.403393 0.097365  | 195.9605 220.2390 245.4670    |
|                                      | C -0.259050 0.182760 1.078208   | 273.1971 338.2935 404.3967    |
|                                      | C 1.007263 0.710264 0.376158    | 476.4753 514.3405 537.2927    |
|                                      | C 0.772315 1.979053 -0.421302   | 605.6712 668.5257 788.5531    |
|                                      | O -1.047320 -1.481187 -0.413070 | 853.4271 907.4230 940.2618    |
|                                      | O 1.511345 -0.211245 -0.569662  | 985.6201 1019.5837 1056.1779  |
|                                      | O 1.733676 -1.455949 0.072072   | 1092.8421 1121.5614 1200.8638 |
|                                      | H -2.221330 1.409681 -0.493299  | 1210.6597 1273.4997 1304.2503 |
|                                      | H -3.059718 -0.088035 -1.002357 | 1368.4114 1387.7548 1406.6888 |
|                                      | H -3.099662 0.463999 0.692723   | 1419.2915 1464.5202 1474.0170 |
|                                      | H 0.031784 -0.611163 1.764171   | 1476.8912 1482.5824 1492.0292 |
|                                      | H -0.703581 0.996119 1.651659   | 1509.5451 1829.3195 3049.9231 |
|                                      | H 1.763069 0.881022 1.148342    | 3063.3908 3071.8410 3093.6043 |
|                                      | H 0.059025 1.797557 -1.225683   | 3126.2363 3145.2243 3147.2522 |
|                                      | H 1.705530 2.314901 -0.868862   | 3157.4160 3184.1427 3686.9112 |
|                                      | H 0.388676 2.768177 0.224058    |                               |
| H 0.890546 -1.902369 -0.121607       |                                 |                               |
| Conf-4                               | C 3.038079 -0.626190 0.270519   | 50.7819 80.6869 109.9725      |
|                                      | C 1.755009 0.026912 -0.178543   | 136.5816 161.3496 221.5602    |
|                                      | C 0.477776 -0.684585 0.215584   | 266.0083 298.0248 335.1258    |
|                                      | C -0.779298 0.095318 -0.121027  | 342.3812 462.0892 490.0147    |
|                                      | C -0.978635 1.309936 0.763389   | 534.2612 616.8740 819.9870    |
|                                      | O 1.749518 1.048626 -0.817738   | 853.7866 888.2797 953.5845    |
|                                      | O -1.824427 -0.860136 0.052517  | 973.2383 993.9931 1051.4658   |
|                                      | O -3.017108 -0.301550 -0.478751 | 1137.4089 1138.2612 1172.4962 |
|                                      | H 3.887043 -0.119357 -0.178081  | 1201.2078 1254.0013 1324.7194 |
|                                      | H 3.109141 -0.567303 1.358101   | 1380.3253 1387.9492 1399.7136 |
|                                      | H 3.042527 -1.683619 0.004898   | 1408.8054 1420.5767 1454.7179 |
|                                      | H 0.513398 -0.921786 1.282743   | 1469.6785 1480.5543 1494.9777 |
|                                      | H 0.461434 -1.645478 -0.307001  | 1510.1782 1849.1979 3057.1568 |
|                                      | H -0.752408 0.392717 -1.171024  | 3063.3363 3069.1730 3084.6508 |
|                                      | H -0.156253 2.009107 0.624996   | 3099.3029 3134.0804 3143.0857 |
|                                      | H -1.020379 1.006915 1.811397   | 3160.6547 3183.6978 3836.8643 |
|                                      | H -1.904121 1.820996 0.504531   |                               |
| H -3.521838 -0.116051 0.321688       |                                 |                               |
| Conf- C -1.779984 -0.953264 0.975026 | 61.3265 88.5346 112.9831        |                               |

|        |          |           |           |           |           |           |           |
|--------|----------|-----------|-----------|-----------|-----------|-----------|-----------|
| 5      | C        | -1.693081 | 0.131253  | -0.068774 | 187.9402  | 199.1766  | 212.1539  |
|        | C        | -0.496307 | 1.067535  | -0.012138 | 247.7535  | 291.1584  | 320.1570  |
|        | C        | 0.817710  | 0.390874  | 0.338455  | 403.3598  | 461.8444  | 477.3529  |
|        | C        | 1.994121  | 1.346137  | 0.306672  | 557.7937  | 588.6374  | 797.8404  |
|        | O        | -2.544494 | 0.281369  | -0.906237 | 822.4325  | 896.6968  | 956.3257  |
|        | O        | 0.950420  | -0.639847 | -0.636409 | 986.5428  | 1007.8945 | 1060.6179 |
|        | O        | 1.994239  | -1.504248 | -0.206718 | 1126.4987 | 1136.1109 | 1169.3086 |
|        | H        | -0.987462 | -1.682597 | 0.798667  | 1237.5625 | 1267.7218 | 1306.9876 |
|        | H        | -1.631705 | -0.540107 | 1.974139  | 1378.3354 | 1389.9450 | 1392.9265 |
|        | H        | -2.748490 | -1.439424 | 0.909770  | 1409.6681 | 1415.7293 | 1452.3693 |
|        | H        | -0.705514 | 1.824208  | 0.749422  | 1471.7328 | 1483.6598 | 1490.7022 |
|        | H        | -0.424999 | 1.574565  | -0.974086 | 1506.8857 | 1856.0612 | 3059.7207 |
|        | H        | 0.749409  | -0.087774 | 1.319614  | 3064.6857 | 3067.1973 | 3069.2684 |
|        | H        | 2.066982  | 1.816702  | -0.674313 | 3130.6809 | 3131.3486 | 3142.8724 |
|        | H        | 2.920578  | 0.815825  | 0.518386  | 3154.8325 | 3183.6801 | 3841.3657 |
|        | H        | 1.869930  | 2.126177  | 1.057499  |           |           |           |
| H      | 2.635201 | -1.400976 | -0.919621 |           |           |           |           |
| Conf-6 | C        | -1.619657 | 0.670781  | -1.217651 | 58.1236   | 92.6873   | 124.4413  |
|        | C        | -1.616054 | -0.124667 | 0.062714  | 197.7895  | 202.3147  | 227.5142  |
|        | C        | -0.578928 | 0.195604  | 1.133946  | 262.4311  | 298.4026  | 327.1169  |
|        | C        | 0.880026  | 0.248984  | 0.673742  | 383.0796  | 466.6080  | 479.9096  |
|        | C        | 1.332216  | 1.566776  | 0.070542  | 545.8571  | 657.1426  | 767.5044  |
|        | O        | -2.434950 | -0.983234 | 0.268543  | 855.5207  | 871.3688  | 970.3230  |
|        | O        | 1.000929  | -0.826078 | -0.254157 | 987.8262  | 1009.4887 | 1059.3065 |
|        | O        | 2.379192  | -0.988266 | -0.558729 | 1103.3526 | 1133.8891 | 1166.9229 |
|        | H        | -1.586357 | 1.740832  | -1.010061 | 1224.6483 | 1286.1551 | 1334.7163 |
|        | H        | -0.732835 | 0.414301  | -1.798282 | 1373.4939 | 1387.7776 | 1393.2881 |
|        | H        | -2.512957 | 0.425315  | -1.784436 | 1408.7314 | 1425.0177 | 1461.8414 |
|        | H        | -0.703344 | -0.564334 | 1.901911  | 1475.6863 | 1481.4136 | 1496.2114 |
|        | H        | -0.836270 | 1.164871  | 1.569735  | 1511.6417 | 1849.8624 | 3050.6142 |
|        | H        | 1.515883  | 0.023025  | 1.534577  | 3069.3085 | 3072.0215 | 3081.6188 |
|        | H        | 1.264910  | 2.356275  | 0.819275  | 3141.1390 | 3145.1322 | 3153.3592 |
|        | H        | 0.725092  | 1.847465  | -0.787135 | 3173.3503 | 3180.9115 | 3834.6416 |
| H      | 2.367924 | 1.485901  | -0.251833 |           |           |           |           |
| H      | 2.550967 | -1.857888 | -0.178775 |           |           |           |           |

Cationic 2,4-KHP Conformers

|                     | Geometry/angstrom |           |           |           | Frequencies/cm <sup>-1</sup> |           |           |
|---------------------|-------------------|-----------|-----------|-----------|------------------------------|-----------|-----------|
| Conf-1 <sup>+</sup> | C                 | 2.683166  | -0.714684 | 0.254395  | 75.2112                      | 96.7376   | 166.7418  |
|                     | C                 | 1.392390  | -0.072029 | -0.140365 | 222.7888                     | 240.6728  | 263.7193  |
|                     | C                 | 0.171938  | -0.937273 | -0.405192 | 311.8752                     | 320.4744  | 374.2015  |
|                     | C                 | -1.074260 | -0.613603 | 0.434103  | 435.8139                     | 500.0478  | 532.0296  |
|                     | C                 | -2.359552 | -0.991565 | -0.259599 | 580.9992                     | 651.6447  | 785.1651  |
|                     | O                 | 1.338668  | 1.132037  | -0.289082 | 823.1380                     | 868.9597  | 908.6832  |
|                     | O                 | -1.065705 | 0.791047  | 0.796144  | 941.2652                     | 1000.8025 | 1007.6067 |
|                     | O                 | -0.835428 | 1.499450  | -0.348346 | 1060.6192                    | 1136.0360 | 1144.3869 |
|                     | H                 | 3.472300  | 0.019902  | 0.371252  | 1187.1049                    | 1258.2520 | 1317.6224 |
|                     | H                 | 2.515032  | -1.261680 | 1.184956  | 1362.8739                    | 1363.9301 | 1372.8624 |
|                     | H                 | 2.941049  | -1.446325 | -0.514610 | 1422.9986                    | 1433.4100 | 1448.1694 |
|                     | H                 | 0.438355  | -1.980147 | -0.252361 | 1460.9082                    | 1464.9309 | 1487.5227 |
|                     | H                 | -0.053205 | -0.784208 | -1.463739 | 1498.7152                    | 1705.0529 | 3058.5207 |
|                     | H                 | -0.999483 | -1.074335 | 1.418250  | 3074.4931                    | 3075.8268 | 3123.9807 |
|                     | H                 | -2.465461 | -0.445374 | -1.196443 | 3126.2910                    | 3152.9928 | 3161.3114 |
|                     | H                 | -3.212721 | -0.777846 | 0.380391  | 3168.2328                    | 3203.0100 | 3682.1035 |
| H                   | -2.351069         | -2.058846 | -0.479965 |           |                              |           |           |
| H                   | -0.667166         | 2.403505  | -0.017500 |           |                              |           |           |
| Conf-2 <sup>+</sup> | C                 | -2.972634 | 0.199522  | 0.099257  | 80.8860                      | 114.6891  | 131.8672  |
|                     | C                 | -1.512858 | -0.100356 | -0.024558 | 159.9156                     | 215.8770  | 236.5161  |
|                     | C                 | -0.520525 | 1.046519  | -0.131436 | 322.0381                     | 340.7100  | 370.2942  |
|                     | C                 | 0.844299  | 0.563648  | 0.307699  | 398.9062                     | 454.8807  | 477.2560  |
|                     | C                 | 1.979908  | 1.518464  | -0.026818 | 529.3297                     | 638.4333  | 789.5409  |



|                     |                                 |                               |
|---------------------|---------------------------------|-------------------------------|
|                     | O -1.082190 -1.228836 -0.056867 | 830.6247 885.3684 933.3501    |
|                     | O 1.046432 -0.662808 -0.435473  | 968.0705 993.7630 1001.5900   |
|                     | O 1.876368 -1.467626 0.271895   | 1057.9566 1125.2026 1147.8513 |
|                     | H -3.560056 -0.706787 0.000370  | 1194.2672 1238.6083 1313.5817 |
|                     | H -3.140522 0.653771 1.078296   | 1349.4816 1378.5877 1384.3822 |
|                     | H -3.251903 0.935065 -0.655979  | 1407.7207 1446.0621 1454.5024 |
|                     | H -0.839547 1.900622 0.464025   | 1470.2662 1481.1928 1496.9836 |
|                     | H -0.515828 1.362008 -1.179528  | 1498.4098 1754.3911 3065.8943 |
|                     | H 0.852186 0.281481 1.360478    | 3069.6424 3080.6581 3117.5470 |
|                     | H 2.929315 1.082013 0.274478    | 3135.2794 3145.5482 3165.6359 |
|                     | H 1.828029 2.443122 0.527787    | 3175.6477 3202.6904 3725.7323 |
|                     | H 1.997825 1.741002 -1.092052   |                               |
|                     | H 2.066470 -2.184925 -0.359183  |                               |
| Conf-3 <sup>+</sup> | C -2.743221 0.014292 0.094496   | 79.5243 115.3069 153.6179     |
|                     | C -1.257791 -0.073715 -0.102548 | 181.5553 204.5337 248.3806    |
|                     | C -0.343166 0.406390 1.012409   | 301.3830 333.5822 375.5823    |
|                     | C 1.059811 0.583790 0.444328    | 383.5561 464.4213 511.1470    |
|                     | C 1.244413 1.803015 -0.427696   | 535.5392 675.5925 795.4826    |
|                     | O -0.773372 -0.530271 -1.108375 | 823.6603 866.7349 913.5711    |
|                     | O 1.358863 -0.548479 -0.389186  | 958.2443 990.6686 1001.8401   |
|                     | O 1.322630 -1.682183 0.378683   | 1041.6561 1122.7128 1162.9545 |
|                     | H -3.017498 1.070601 0.048943   | 1171.7417 1231.3500 1279.2381 |
|                     | H -3.262644 -0.541096 -0.678638 | 1325.1543 1346.8611 1374.0012 |
|                     | H -2.996603 -0.353681 1.088324  | 1425.8787 1443.4175 1454.0208 |
|                     | H -0.384781 -0.357341 1.793126  | 1471.3821 1484.1359 1487.4276 |
|                     | H -0.719714 1.333464 1.443940   | 1504.3253 1735.1047 3067.6414 |
|                     | H 1.787952 0.546314 1.259774    | 3069.2432 3085.1829 3085.4502 |
|                     | H 0.520882 1.821407 -1.241168   | 3139.7954 3144.4869 3165.2143 |
|                     | H 2.247185 1.822628 -0.847477   | 3173.4219 3204.5838 3741.4725 |
|                     | H 1.112235 2.692790 0.185320    |                               |
|                     | H 1.687731 -2.350251 -0.227051  |                               |
| Conf-4 <sup>+</sup> | C 2.949077 -0.651330 0.491418   | 48.5153 75.1381 105.7067      |
|                     | C 1.747224 -0.011160 -0.143771  | 117.8793 198.2441 276.5432    |
|                     | C 0.402171 -0.727715 0.112405   | 301.4164 329.4723 337.7564    |
|                     | C -0.713031 0.250932 -0.281116  | 425.2360 482.3801 552.5338    |
|                     | C -1.019579 1.332561 0.710850   | 575.2574 621.0376 720.9721    |
|                     | O 1.775572 0.972834 -0.821251   | 810.2244 825.2115 871.4489    |
|                     | O -1.827796 -0.618897 -0.574050 | 966.1286 994.5812 1043.1522   |
|                     | O -2.872977 -0.412564 0.215674  | 1060.0861 1126.6538 1154.1146 |
|                     | H 3.850653 -0.187500 1.04211    | 1169.3224 1211.5427 1272.8577 |
|                     | H 2.890819 -0.506781 1.571825   | 1284.2176 1338.6445 1382.3777 |
|                     | H 2.950835 -1.724417 0.301612   | 1425.7360 1452.9288 1460.9287 |
|                     | H 0.304060 -1.051730 1.148875   | 1470.2976 1484.0253 1489.0612 |
|                     | H 0.401171 -1.614846 -0.525736  | 1496.1879 1850.3842 2996.3502 |
|                     | H -0.446936 0.647033 -1.272767  | 3070.5156 3077.9275 3079.2999 |
|                     | H -0.132244 1.958754 0.782047   | 3135.9490 3142.4266 3160.7758 |
|                     | H -1.249671 0.923278 1.693614   | 3169.4458 3195.4862 3653.7780 |
|                     | H -1.847538 1.955235 0.376717   |                               |
|                     | H -3.514701 -1.089743 -0.082100 |                               |
| Conf-5 <sup>+</sup> | C -1.796328 -0.838943 1.023303  | 59.6330 70.5272 117.4588      |
|                     | C -1.581553 0.207727 -0.055129  | 171.0961 189.3821 217.1721    |
|                     | C -0.389920 1.216003 0.049679   | 249.6510 282.4504 303.9759    |
|                     | C 0.858187 0.391853 0.340227    | 335.9707 404.8802 455.0300    |
|                     | C 2.106314 1.249336 0.232320    | 489.5313 558.6070 662.0437    |
|                     | O -2.293113 0.306547 -0.999625  | 834.7465 880.5322 906.7094    |
|                     | O 0.804360 -0.635831 -0.635730  | 931.9708 979.5227 1023.7953   |
|                     | O 1.615992 -1.693594 -0.154762  | 1073.2905 1090.0366 1116.7365 |
|                     | H -1.012909 -1.583187 0.857246  | 1142.8202 1202.8540 1267.5887 |
|                     | H -1.655774 -0.354055 1.987816  | 1324.7430 1351.3710 1387.7491 |
|                     | H -2.783015 -1.276913 0.919378  | 1399.2579 1424.7220 1444.3520 |



|                     |          |           |           |           |           |           |           |
|---------------------|----------|-----------|-----------|-----------|-----------|-----------|-----------|
|                     | H        | -0.652192 | 1.894178  | 0.864333  | 1446.3517 | 1461.8104 | 1485.2506 |
|                     | H        | -0.328678 | 1.754231  | -0.892642 | 1489.7692 | 1695.5987 | 3061.0338 |
|                     | H        | 0.793795  | -0.068272 | 1.328828  | 3073.3776 | 3083.4103 | 3091.8746 |
|                     | H        | 2.178151  | 1.700437  | -0.755936 | 3153.7296 | 3156.0362 | 3164.1936 |
|                     | H        | 2.970459  | 0.606938  | 0.397466  | 3177.1042 | 3212.0159 | 3809.0901 |
|                     | H        | 2.110921  | 2.030648  | 0.990531  |           |           |           |
|                     | H        | 2.181122  | -1.876828 | -0.918492 |           |           |           |
| Conf-6 <sup>+</sup> | C        | -1.644264 | 0.549919  | -1.296554 | 71.5807   | 89.1262   | 106.0388  |
|                     | C        | -1.514103 | -0.080158 | 0.079055  | 182.2582  | 192.8988  | 231.8138  |
|                     | C        | -0.561039 | 0.473684  | 1.173514  | 241.6249  | 276.4663  | 300.0958  |
|                     | C        | 0.890471  | 0.352548  | 0.667338  | 361.3803  | 374.6168  | 452.7035  |
|                     | C        | 1.389609  | 1.531376  | -0.137907 | 491.1547  | 600.9474  | 670.5680  |
|                     | O        | -2.171547 | -1.028904 | 0.376092  | 828.8478  | 874.1941  | 919.5503  |
|                     | O        | 0.854868  | -0.864397 | -0.066253 | 945.0815  | 995.5859  | 1024.7476 |
|                     | O        | 2.156028  | -1.124595 | -0.552965 | 1069.9956 | 1082.4532 | 1108.4310 |
|                     | H        | -1.631085 | 1.630434  | -1.174020 | 1149.2068 | 1214.8025 | 1276.9284 |
|                     | H        | -0.758060 | 0.216776  | -1.841134 | 1320.2746 | 1335.4639 | 1381.9608 |
|                     | H        | -2.551561 | 0.197706  | -1.775959 | 1421.3115 | 1434.3200 | 1443.7610 |
|                     | H        | -0.733227 | -0.108284 | 2.073539  | 1451.0193 | 1463.0212 | 1484.8736 |
|                     | H        | -0.868474 | 1.510861  | 1.320368  | 1504.4664 | 1647.0719 | 3053.6306 |
|                     | H        | 1.510679  | 0.219691  | 1.559161  | 3070.5252 | 3087.3099 | 3093.7713 |
|                     | H        | 1.365899  | 2.433188  | 0.472913  | 3163.3239 | 3165.4910 | 3174.7026 |
|                     | H        | 0.804891  | 1.698804  | -1.040351 | 3184.6296 | 3210.5439 | 3808.7044 |
|                     | H        | 2.419810  | 1.348845  | -0.433967 |           |           |           |
| H                   | 2.362284 | -1.969077 | -0.128218 |           |           |           |           |

126  
127  
128  
129

V. Simulation of Vibronic Envelopes:

131 The vibrationally-resolved photoionization spectra were simulated using a locally modified  
132 version of Gaussian. To set up the computational protocol, calculations were first performed at T=0K  
133 using the sum-over-states (time-independent, TI) formulation<sup>16</sup> where the spectrum is obtained as an  
134 ensemble of distinct transitions between the vibrational initial and final states, within both adiabatic  
135 Hessian (AH) and vertical Hessian (VH) methods to describe the final-state potential energy surface. In  
136 AH, the harmonic potential energy surface is computed about the final-state minimum, while for VH,  
137 the surface is computed at the initial-state minimum. If there are no structural changes upon  
138 ionization, the spectra computed with AH or VH will give the same results. Otherwise, they generally  
139 represent limit conditions, with VH predicting better band intensities, while AH predict better their  
140 positions. It should be noted that, since the final-state equilibrium structure is unknown with VH, it is  
141 extrapolated assuming that the potential energy surface is purely harmonic. While this can sometimes  
142 lead to better results thanks to an error compensation due to the harmonic approximation assumed  
143 to compute the spectral band-shape, it can also lead to severe misrepresentations of the structural  
144 changes. This is discussed in more details below.

145 As with our previous work on tert-butyl hydroperoxide,<sup>17</sup> the structural changes for most  
146 conformers are quite large with strong mode mixing. It is noteworthy that the use of the AH or VH  
147 models leads to very different behaviors. For AH, Cartesian-based normal coordinates are clearly ill-

148 suited, with the predicted spectra being extremely broad and with very weak intensities. The use of *ad*  
 149 *hoc* internal coordinates, more specifically the generalized internal coordinates (see Baiardi et al.<sup>18</sup> for  
 150 details), is necessary to predict correctly the band-shapes or, for some conformers, even get any result.  
 151 To reach a good convergence, that is, being able to recover all non-negligible transitions within the TI  
 152 framework, a reduced-dimensionality scheme had to be applied. For Cartesian coordinates, the  
 153 number of modes to remove was excessively large (up to 40 out of 48), rendering the result unusable.  
 154 For internal coordinates, the modes to be removed were first selected based on the shift vector from  
 155 the Duschinsky transformation<sup>19</sup> ( $K$ ), considering modes from the initial states shifted by at least 0.75  
 156 atomic units. Then, modes from the final and initial states to discard were chosen iteratively based on  
 157 their overlap using the Duschinsky matrix. The threshold for the convergence was set to 0.7 (0.65 for  
 158 conf-4) using the algorithm described in section F of Baiardi et al.<sup>18</sup>. For the three most abundant  
 159 conformers, 8 modes were removed: 1, 2, 4-6, 11-13 for the initial state of conf-1, ordering the modes  
 160 by increasing energy, 1-4, 7- 10 for conf-2, and 1-8 for conf-4 within the AH model. The final  
 161 progression, using the class-based prescreening described in Santoro et al.<sup>20</sup> with parameters  $C_1^{\max}=50$ ,  
 162  $C_2^{\max}=50$ , and  $N_l^{\max}=10^9$ , was 96.54% for conf-1, 98.59% for conf-2 and 94.54% for conf-4. For VH,  
 163 because of the lower predicted shift, a threshold of 0.8 was sufficient to construct the blocks of modes  
 164 to remove. Using the same base criterion to select the initial group of modes to remove, 6 modes were  
 165 removed for conf-1 (1- 4, 12, 13), 4 for conf-2 (1-4) and 5 for conf-4 (1, 2, 4-6). The progression reached  
 166 almost 100%, respectively at 99.66%, 99.87% and 99.97%.

167 For VH, the differences between internal and Cartesian coordinates are more subtle. First of  
 168 all, the cations of conformers 1, 2 and 4 exhibited one or two imaginary frequencies at the neutral-  
 169 form equilibrium geometry. They were systematically selected to be removed. Initial-state modes with  
 170 an associated shift ( $K_i$ ) greater than 75 atomic units were also selected. As a result, and choosing a  
 171 threshold of 0.8 to build a consistent set of modes to remove in each states, 6 modes were selected  
 172 for conf-1 (1-4, 12, 13 in the initial state), 3 modes for conf-2 (1-3) and 6 for conf-4 (1-6). The total  
 173 progression was respectively 99.90%, 99.44% and 99.97%.

174 The final spectra are shown in Fig. S5. Gaussian distribution functions with half-widths at half  
 175 maximum of 250  $\text{cm}^{-1}$  were used to match experiment.

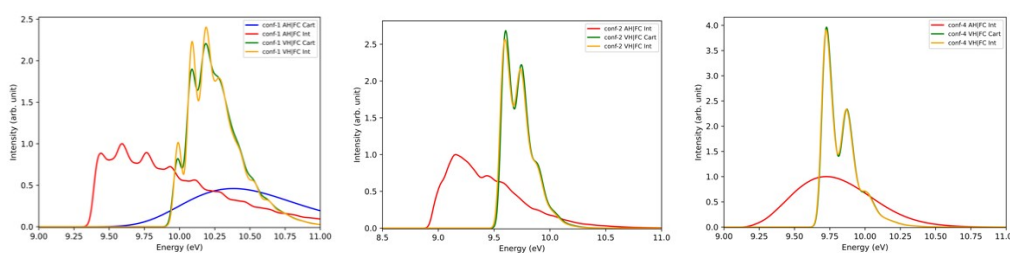

176

177 *Figure S5. Simulated PES of conformers 1 (left), 2 (center) and 4 (right) of 2,4-KHP at the TI AH|FC and*  
178 *VH|FC levels at T=0 K. Gaussian distribution functions with half-widths at half-maximum of 250 cm<sup>-1</sup> were used*  
179 *to simulate the experimental broadening. To compare internal and Cartesian AH|FC band-shapes, the modes*  
180 *automatically selected with internal coordinates were used for Cartesians and mode mixing was ignored to*  
181 *have model systems of the same size. For conformers 2 and 4, it was impossible to get any band-shape.*

182 The excellent progression obtained with the reduced-dimensionality schemes confirm the applicability  
183 of the Franck-Condon principle in these conditions. To ensure that fully converged band-shapes were  
184 systematically obtained and to include temperature effects in a cost-effective manner, the time-  
185 dependent (TD) framework described in Baiardi et al.<sup>21</sup> was then used for an implicit inclusion of all  
186 possible transitions by exploiting the properties of the Fourier transform. The default parameters  
187 reported in the original paper were used to compute the auto-correlation function and build the  
188 resulting spectrum.

189 Proceeding further into our analysis, since augmented basis functions can play a greater role  
190 in the calculation of normal modes and frequencies than for the structure, the harmonic PES of the  
191 neutral and cationic forms of the three most abundant conformers were computed at the M06-2X-  
192 D3/aug-cc-pVTZ as well. As shown in Fig. S6, the changes are practically negligible in the spectral band-  
193 shapes. The normal modes are only slightly different, and all wavenumbers within 10 cm<sup>-1</sup>. As a result,  
194 and for consistency with the rest of the analysis, only the cc-pVTZ results were used.

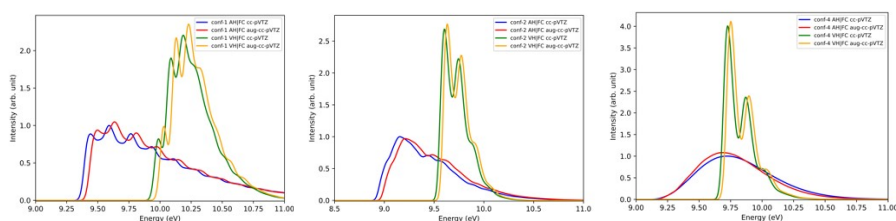

195

196 *Figure S6. Comparison of the simulated PES of conformers 1 (left), 2 (center) and 4 (right) of 2,4-KHP at*  
197 *the TD AH|FC and VH|FC levels at T=0K. The potential energy surfaces were computed at the M06-2X-D3/cc-*  
198 *pVTZ and the M06-2X-D3/aug-cc-pVTZ. Gaussian distribution functions with half-widths at half-maximum of*  
199 *250 cm<sup>-1</sup> were used to simulate the experimental broadening.*

200

201 To further analyze the sensitivity of the spectra to the uncertainties in the relative energies,  
202 we performed simulations at three different temperatures: 300 K, 585 K, and 800 K (Figure S7). At  
203 lower temperatures (300 K), the most stable conformer (conformer 1) dominates. The lower  
204 temperature also leads to less broadening caused by hotbands, resulting in sharper spectral features.  
205 At higher temperatures (585 K and 800 K), the populations become more evenly distributed among  
206 the conformers and mostly stabilized. The contributions from more populated initial vibrational states

207 lead to broader spectral features. Despite these changes in populations, the overall spectral trends  
 208 remain relatively consistent across temperatures, highlighting the robustness of the simulated spectra  
 209 with respect to uncertainties in the relative free energies of the conformers.

210

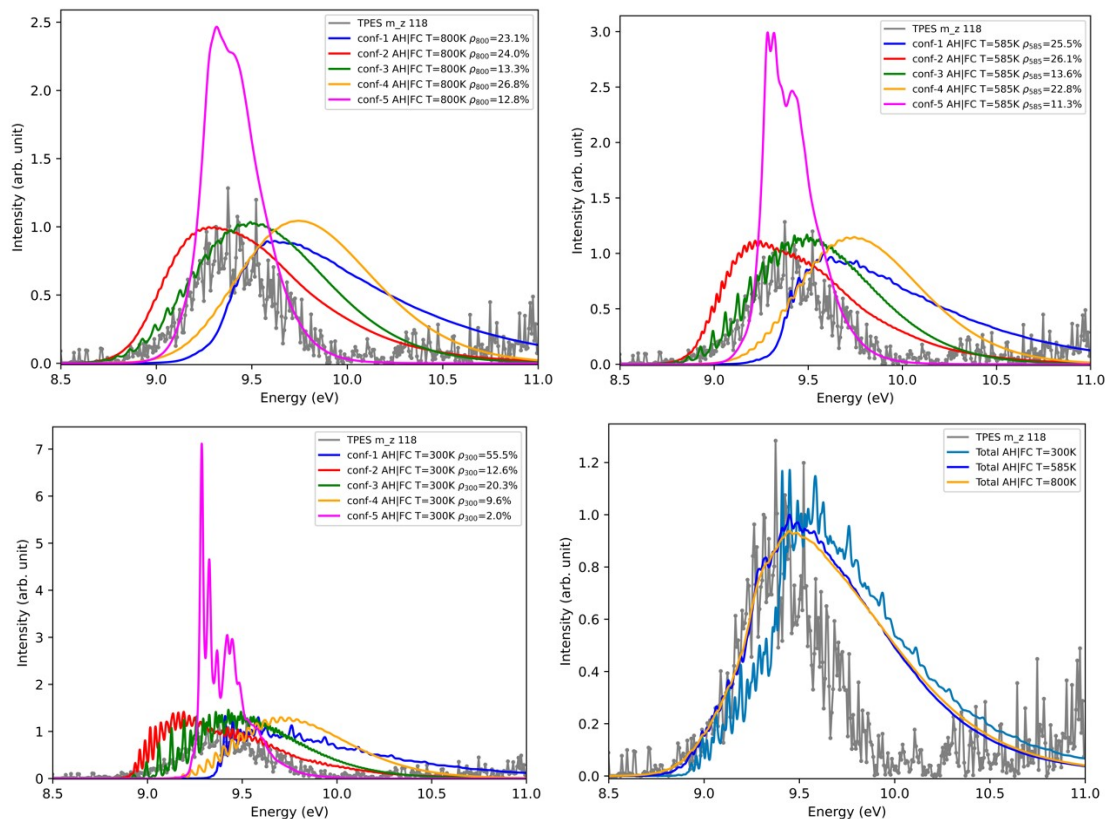

211

212

213

213 *Figure S7. Simulated spectra at three different temperatures (300 K, 585 K, and 800 K) and their impact*  
 214 *on conformer populations and overall spectral shapes.*

214

215

216

217

218

219

220

221

222

223

224

As a final analysis, we compared the structural changes predicted by VH with the real minima (Fig. S7), the Duschinsky matrix with AH and VH (Fig. S8) and the shift vector (Fig. S9). From Fig. S7, the extrapolated minimum geometries from VH are systematically close to the initial-states ones, and relatively far from the real one, which means that VH strongly underestimates the structural changes. This is confirmed by the shift vectors, on overall slightly smaller than with AH. Together with a smaller mode mixing (Fig. S8), this explains the narrower band-shape obtained with VH, as shown in Fig. S10. The final spectra obtained by combining the contributions from the 5 most abundant conformers with their abundances calculated at T= 585 K are shown in Fig. S11. VH shows a significantly shifted and slightly narrower band-shape compared to experiment. Conversely, AH is in very good agreement in terms of band positions but slightly overestimates its width, as discussed in the main text.

225

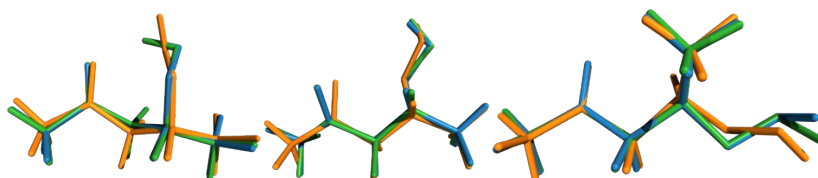

226 Figure S7. Comparison of initial-state equilibrium geometry (blue), final-state equilibrium geometry (orange),  
227 and extrapolated equilibrium geometry within the VH model (green) for conformers 1 (left), 2 (center) and 4  
228 (right) 2,4-KHP. The structures were superimposed to minimize the rotations and translations between the  
229 structures.

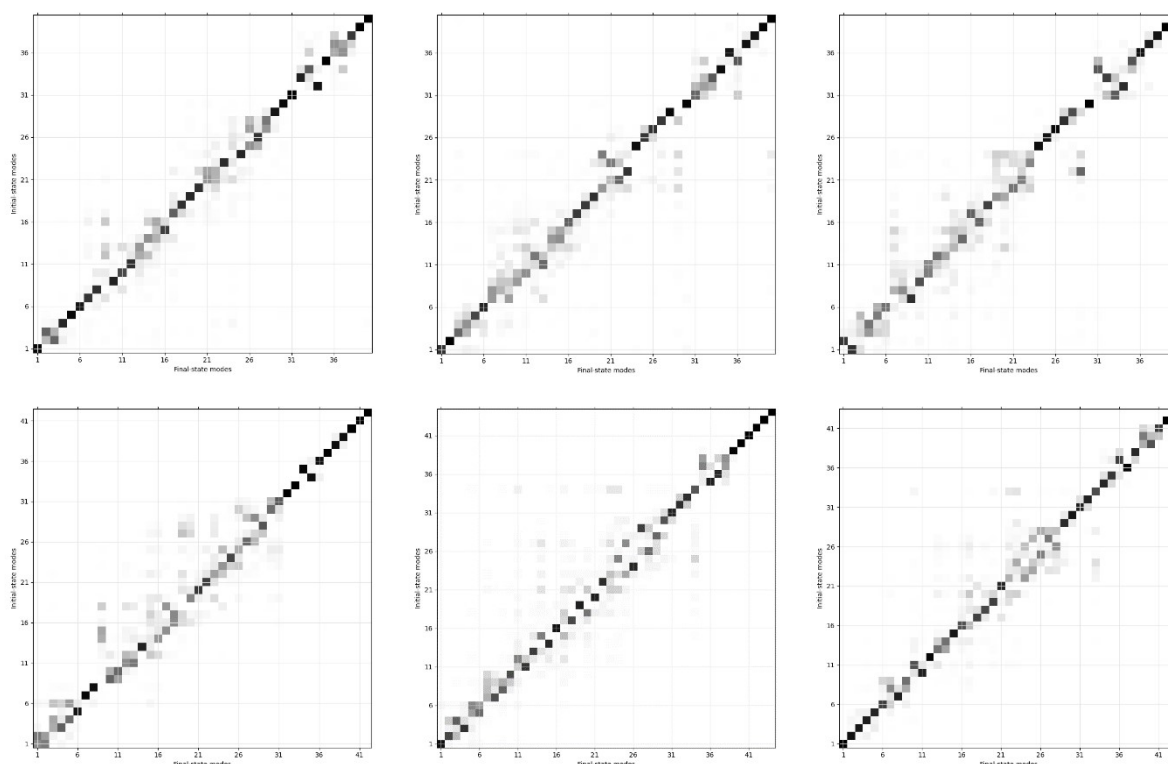

230 Figure S8. Comparison of the graphical representations of the Duschinsky matrices  $J$  at the AH (top)  
231 and VH (bottom levels) of conformers 1 (left), 2 (center) and 4 (right) 2,4-KHP, with normal modes based on  
232 internal coordinates. The squared value of each element was computed and divided by the sum of all elements  
233 in each row, then a shade of gray from white (0) to black (1) was assigned in the matrix.

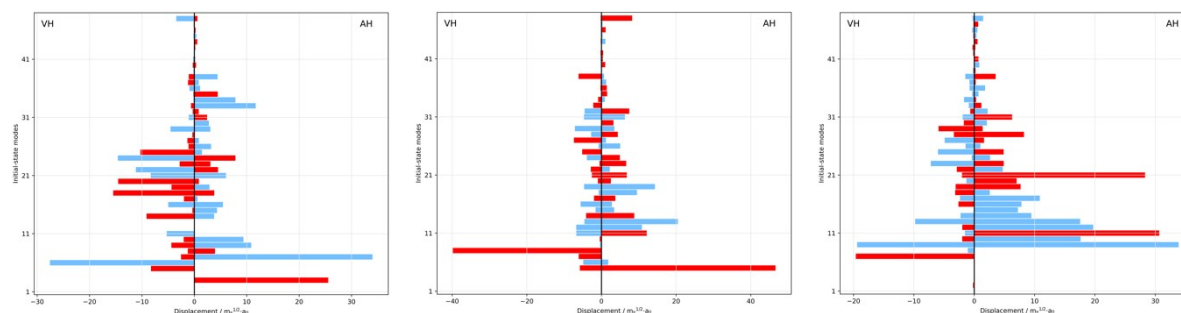

234 Figure S9. Comparison of the graphical representations of the shift vector  $K$  from the Duschinsky  
235 transformation conformers 1 (left), 2 (center) and 4 (right) 2,4-KHP. To show the magnitudes of the

236 displacements, absolute values are reported, and negatives values are showed in red. The absolute values are  
 237 multiplied by -1 for the VH shift vector. To facilitate comparisons, all modes are shown. A null value was  
 238 assigned to each mode removed from the reduced-size model.

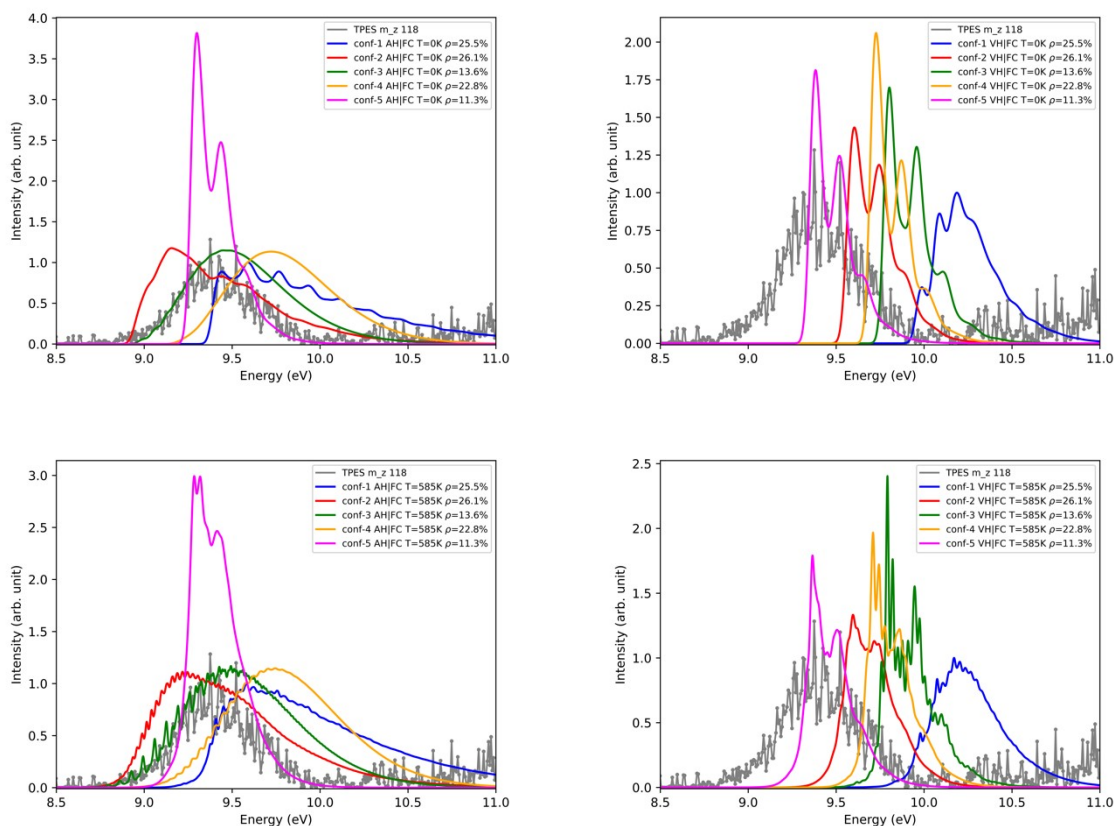

239 *Figure S10. Comparison of the simulated PES of the 5 most abundant conformers of 2,4-KHP at the TD*  
 240 *AH|FC (left) and VH|FC (right) at T=0 K (top) and 585 K (bottom). Gaussian distribution functions with half-*  
 241 *widths at half-maximum of 250 cm<sup>-1</sup> were used to simulate the experimental broadening at T=0 K and 50 cm<sup>-1</sup>*  
 242 *at T=585 K. The intensities were normalized based on the total intensity, assuming a Boltzmann population ( $\rho$ )*  
 243 *of 1 for each conformer. The computed abundances are reported in the legend.*

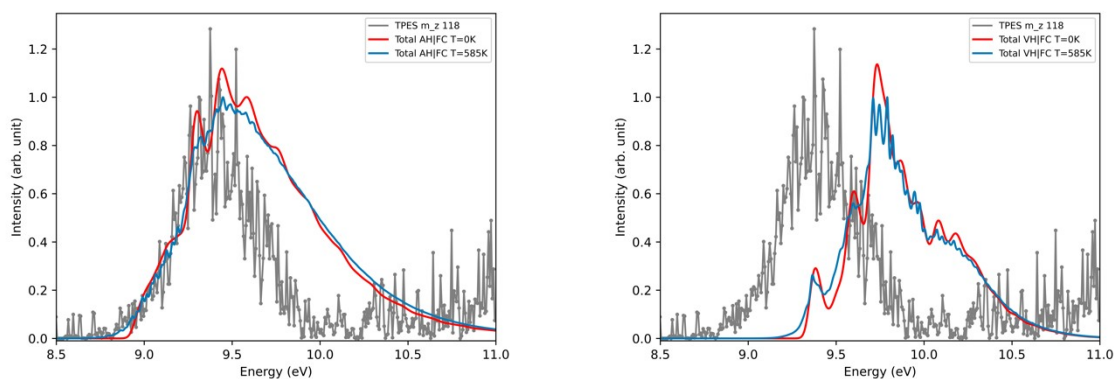

244 *Figure S11. Comparison of the simulated PES of 2,4-KHP including the 5 most abundant conformers at*  
 245 *the TD AH|FC (left) and VH|FC (right) levels. Gaussian distribution functions with half-widths at half-maximum*  
 246 *of 250 cm<sup>-1</sup> were used to simulate the experimental broadening at T=0 K and 50 cm<sup>-1</sup> at T=585 K.*



247  
248  
249

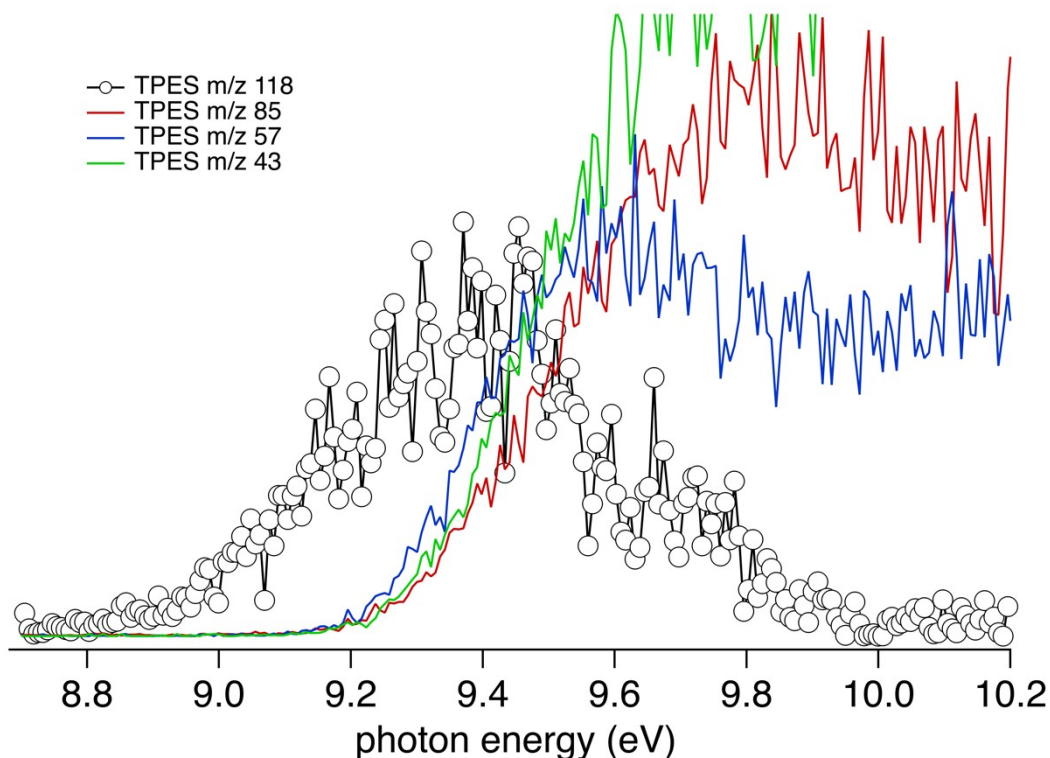

250  
251  
252  
253

Figure S12. TPES of m/z 43 (green line), 57 (blue line), 85 (red line), and 118 (open dots) from Battin-Leclerc et al.<sup>22</sup>

254 VI. KHP Quantification Method:  
255 Quantification of KHP was achieved via several ways. Similar to the method employed in Bourgalais et  
256 al.<sup>23</sup>, an internal standard with a known mole fraction was used at 10.5 eV to convert the normalized  
257 ion signal of a given species to its mole fraction. At 10.5 eV, the mole fraction of reaction products can  
258 be calculated with the fuel, *n*-pentane, as a reference:

259

$$x_i(T) = x_{fuel}(T) \cdot \frac{S_i(T,E)}{S_{fuel}(T,E)} \cdot \frac{\sigma_{fuel}(E)}{\sigma_i(E)} \cdot \frac{D_{fuel}}{D_i}$$

260  
261

262  $x_i(T)$ ,  $S_i(T,E)$ , and  $\sigma_i(E)$  represent respectively the mole fraction, the signal, and the PICS of species  
263  $i$  at the photon energy  $E$  and the temperature  $T$ .  $D_i$  is the mass discrimination factor of species  $i$   
264 approximated as the square root of the mass of each species  $i$ . For the quantification of KHP, there are  
265 three different ways of determining the molar fraction:

266

267 (1) by using the parent signal of KHP at m/z 118 and its partial experimental PICS from Hu et al.<sup>2</sup> (1.13  
268 Mb at 10.6 eV).



269

270 (2) by using the signal of each KHP fragment and its partial experimental PICS (from Hu et al.<sup>2</sup>, m/z 85  
271 fragment has a partial PICS of 7.36 Mb at 10.6 eV).

272

273 (3) by using the total signal of KHP (parent m/z 118 + fragments: m/z 43, 57, and 85) and the  
274 corresponding total PICS estimated using Bobeldijk's method<sup>24</sup> based on bond additivity: 21.25 Mb at  
275 10.6 eV with an uncertainty of ~25% based on values provided by Rodriguez et al.<sup>25</sup> The details of the  
276 calculation are provided below:

277

$$\sigma_{C_5H_{10}O_3} = (4 \times \sigma_{C-C}) + (1 \times \sigma_{C-O}) + (1 \times \sigma_{C=O}) = (4 \times 2.03) + (1 \times 4.83) + (1 \times 4.83)$$

278  
279

280 It should be noted that in this estimation of the cross section, it is assumed that the contribution of  
281 the O-O group is zero, which may potentially underestimate the cross section.

282

283 The total uncertainty propagation is:

$$\Delta R = \sqrt{(0.64 \times 8.12)^2 + (0.16 \times 4.83)^2 + (0.12 \times 8.30)^2} = 5.35 \text{ Mb}$$

284  
285

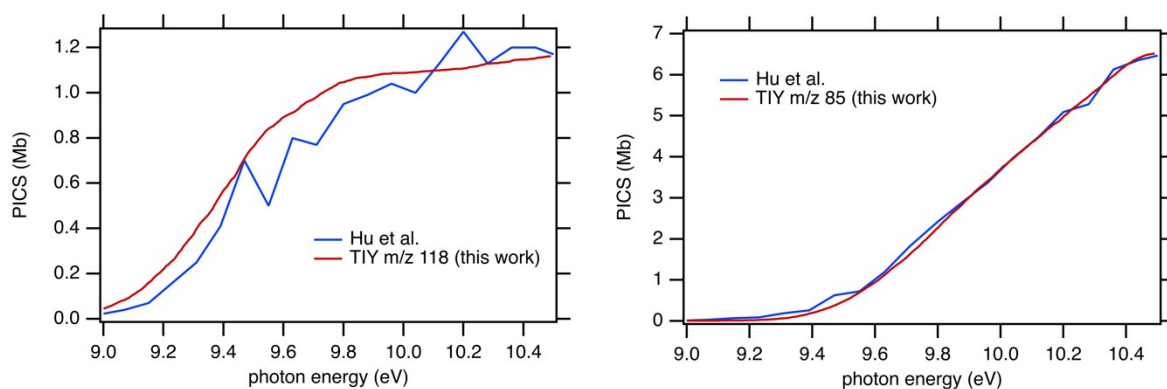

286

287 Figure S13. Comparison between the TIY of m/z 118 (left panel) and m/z 85 (right panel) registered in  
288 this work (red line) and in Hu et al.<sup>2</sup> (blue line).

289

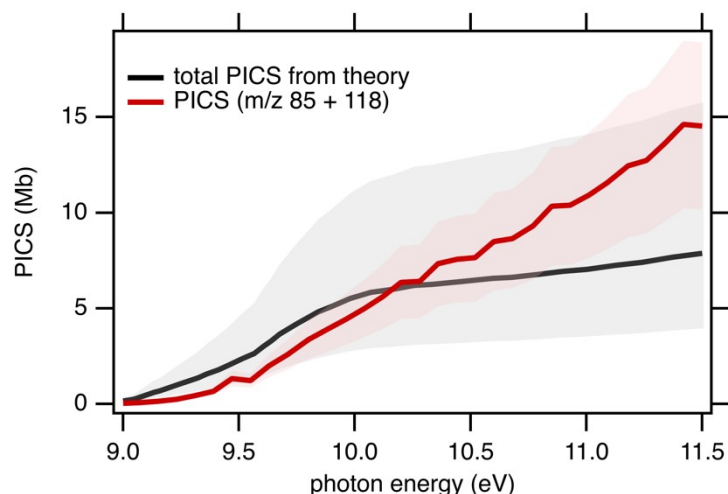

290

291 Figure S14. Comparison between the sum of the PICS  $m/z$  85 and 118 from Hu et al.<sup>2</sup> (red line) and  
 292 the total PICS calculated using the method by Moshhammer et al.<sup>26</sup> (black line).

293

294

295 References:

- 296 1 D. L. Osborn, P. Zou, H. Johnsen, C. C. Hayden, C. A. Taatjes, V. D. Knyazev, S. W. North, D. S.  
 297 Peterka, M. Ahmed and S. R. Leone, *Review of Scientific Instruments*.
- 298 2 Z. Hu, Q. Di, B. Liu, Y. Li, Y. He, Q. Zhu, Q. Xu, P. Dagaut, N. Hansen, S. M. Sarathy, L. Xing, D.  
 299 G. Truhlar and Z. Wang, *Proc. Natl. Acad. Sci. U.S.A.*, 2023, 120, e2220131120.
- 300 3 F. Jorand, A. Heiss, O. Perrin, K. Sahetchian, L. Kerhoas and J. Einhorn, *International journal of*  
 301 *chemical kinetics*, 2003, 35, 354–366.
- 302 4 M. Bursch, J.-M. Mewes, A. Hansen and S. Grimme, *Angewandte Chemie International*  
 303 *Edition*, 2022, 61, e202205735.
- 304 5 T. Lu, Molclus program, version 1.12, <http://www.keinsci.com/research/molclus.html>.
- 305 6 C. Bannwarth, S. Ehlert and S. Grimme, *J. Chem. Theory Comput.*, 2019, 15, 1652–1671.
- 306 7 S. Grimme, C. Bannwarth and P. Shushkov, *J. Chem. Theory Comput.*, 2017, 13, 1989–2009.
- 307 8 Y. Zhao and D. G. Truhlar, *Theor Chem Account*, 2008, 120, 215–241.
- 308 9 S. Grimme, J. Antony, S. Ehrlich and H. Krieg, *J. Chem. Phys.*, 2010, 132, 154104.
- 309 10 T. H. Dunning, *J. Chem. Phys.*, 1989, 90, 1007–1023.
- 310 11 K. Raghavachari, G. W. Trucks, J. A. Pople and M. Head-Gordon, *Chemical Physics Letters*,  
 311 1989, 157, 479–483.
- 312 12 T. Lu and Q. Chen, *Computational and Theoretical Chemistry*, 2021, 1200, 113249.
- 313 13 I. M. Alecu, J. Zheng, Y. Zhao and D. G. Truhlar, *J. Chem. Theory Comput.*, 2010, 6, 2872–2887.
- 314 14 M. J. Frisch, G. W. Trucks, H. B. Schlegel, G. E. Scuseria, M. A. Robb, J. R. Cheeseman, G.  
 315 Scalmani, V. Barone, G. A. Petersson, H. Nakatsuji, X. Li, M. Caricato, A. V. Marenich, J. Bloino, B. G.  
 316 Janesko, R. Gomperts, B. Mennucci, H. P. Hratchian, J. V. Ortiz, A. F. Izmaylov, J. L. Sonnenberg,  
 317 Williams, F. Ding, F. Lipparini, F. Egidi, J. Goings, B. Peng, A. Petrone, T. Henderson, D. Ranasinghe, V.  
 318 G. Zakrzewski, J. Gao, N. Rega, G. Zheng, W. Liang, M. Hada, M. Ehara, K. Toyota, R. Fukuda, J.  
 319 Hasegawa, M. Ishida, T. Nakajima, Y. Honda, O. Kitao, H. Nakai, T. Vreven, K. Throssell, J. A.  
 320 Montgomery Jr., J. E. Peralta, F. Ogliaro, M. J. Bearpark, J. J. Heyd, E. N. Brothers, K. N. Kudin, V. N.  
 321 Staroverov, T. A. Keith, R. Kobayashi, J. Normand, K. Raghavachari, A. P. Rendell, J. C. Burant, S. S.  
 322 Iyengar, J. Tomasi, M. Cossi, J. M. Millam, M. Klene, C. Adamo, R. Cammi, J. W. Ochterski, R. L.  
 323 Martin, K. Morokuma, O. Farkas, J. B. Foresman and D. J. Fox, Gaussian 16 Rev. C.01 2016.
- 324 15 F. Neese, *WIREs Comput Mol Sci*, 2018, 8, e1327.
- 325 16 M. Biczysko, J. Bloino, F. Santoro and V. Barone, in *Computational Strategies for*  
 326 *Spectroscopy*, John Wiley & Sons, Ltd, 2011, pp. 361–443.

327 17 J. Bourgalais, Z. Jiang, J. Bloino, O. Herbinet, H.-H. Carstensen, G. A. Garcia, P. Arnoux, L.-S.  
328 Tran, G. Vanhove, L. Nahon, F. Battin-Leclerc and M. Hochlaf, *Phys. Chem. Chem. Phys.*, 2022, 24,  
329 10826.  
330 18 A. Baiardi, J. Bloino and V. Barone, *J. Chem. Phys.*, 2016, 144, 084114.  
331 19 F. Duschinsky, *Acta Physicochim. URSS*, 1937, 7, 551–566.  
332 20 F. Santoro, R. Improta, A. Lami, J. Bloino and V. Barone, *J. Chem. Phys.*, 2007, 126, 084509.  
333 21 A. Baiardi, J. Bloino and V. Barone, *J. Chem. Theory Comput.*, 2013, 9, 4097–4115.  
334 22 F. Battin-Leclerc, J. Bourgalais, Z. Gouid, O. Herbinet, G. Garcia, P. Arnoux, Z. Wang, L.-S. Tran,  
335 G. Vanhove and L. Nahon, *Proceedings of the Combustion Institute*, 2021, 38, 309–319.  
336 23 J. Bourgalais, O. Herbinet, H.-H. Carstensen, J. Debleza, G. A. Garcia, P. Arnoux, L. S. Tran, G.  
337 Vanhove, B. Liu, Z. Wang, M. Hochlaf, L. Nahon and F. Battin-Leclerc, *Energy Fuels*, 2021, 35, 19689–  
338 19704.  
339 24 M. Bobeldijk, W. J. van der Zande and P. G. Kistemaker, *Chemical Physics*, 1994, 179, 125–  
340 130.  
341 25 A. Rodriguez, O. Herbinet, X. Meng, C. Fittschen, Z. Wang, L. Xing, L. Zhang and F. Battin-  
342 Leclerc, *J. Phys. Chem. A*, 2017, 121, 1861–1876.  
343 26 K. Moshhammer, A. W. Jasper, D. M. Popolan-Vaida, Z. Wang, V. S. Bhavani Shankar, L. Ruwe,  
344 C. A. Taatjes, P. Dagaut and N. Hansen, *J. Phys. Chem. A*, 2016, 120, 7890–7901.  
345  
346
